# Supplementary material
Source: publisher figshare collection journal article supplement (https://karger.figshare.com/articles/dataset/_/5121508)
Supplement: Supplementary file 3 [file 1]

**Supplementary Table 1.**

|                                    | Stimulation condition |         | Time constant ( $\tau$ ) | # of cell analyzed | <i>p</i> value |
|------------------------------------|-----------------------|---------|--------------------------|--------------------|----------------|
| <b>Cultured hippocampal neuron</b> | <b>5 Hz, 300 APs</b>  | Control | $23.0 \pm 1.8$ s         | 5                  | $p < 0.01$     |
|                                    |                       | Dyrk1A  | $56.7 \pm 5.7$ s         | 3                  |                |
|                                    | <b>10 Hz, 300 APs</b> | Control | $27.0 \pm 2.3$ s         | 5                  | $p < 0.01$     |
|                                    |                       | Dyrk1A  | $47.4 \pm 7.4$ s         | 4                  |                |
|                                    | <b>20 Hz, 300 APs</b> | Control | $27.3 \pm 1.3$ s         | 5                  | $p < 0.01$     |
|                                    |                       | Dyrk1A  | $41.9 \pm 3.2$ s         | 4                  |                |
| <b>TG mouse</b>                    | <b>5 Hz, 300 APs</b>  | Non-TG  | $26.2 \pm 3.2$ s         | 4                  | $p < 0.01$     |
|                                    |                       | TG      | $44.4 \pm 2.9$ s         | 6                  |                |
